# Supplementary material
Source: MDPI journal article supplement (https://www.mdpi.com/2227-9717/11/9/2679)
Supplement: s1 [file s1]

## Figures

**Figure S1.** XRD patterns of raw materials ((a) Carbide slag, (b) GBF slag, (c) Coal fly ash, (d) FGD gypsum).

**Figure S2.** Compaction curves of the mixtures of curing agent and saline soil at different curing agent contents.

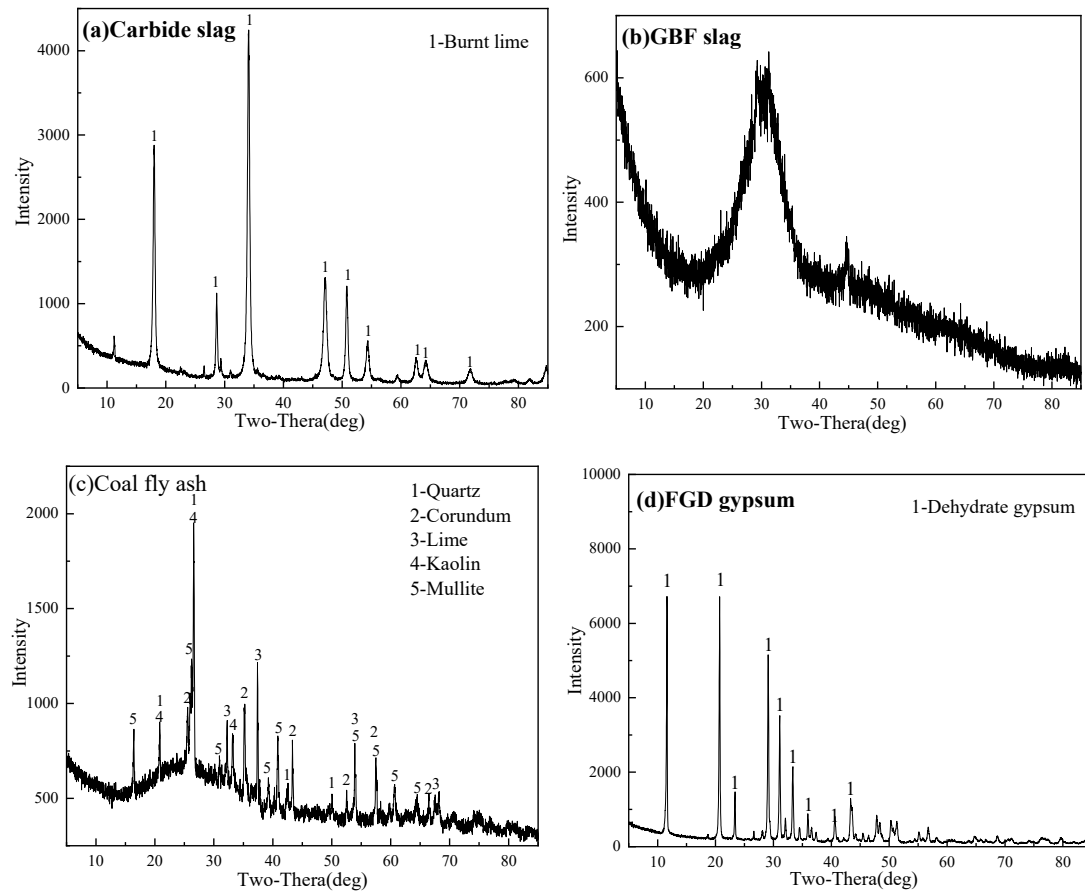

**Figure S1** XRD patterns of raw materials ((a) Carbide slag, (b) GBF slag, (c) Coal fly ash, (d) FGD gypsum).

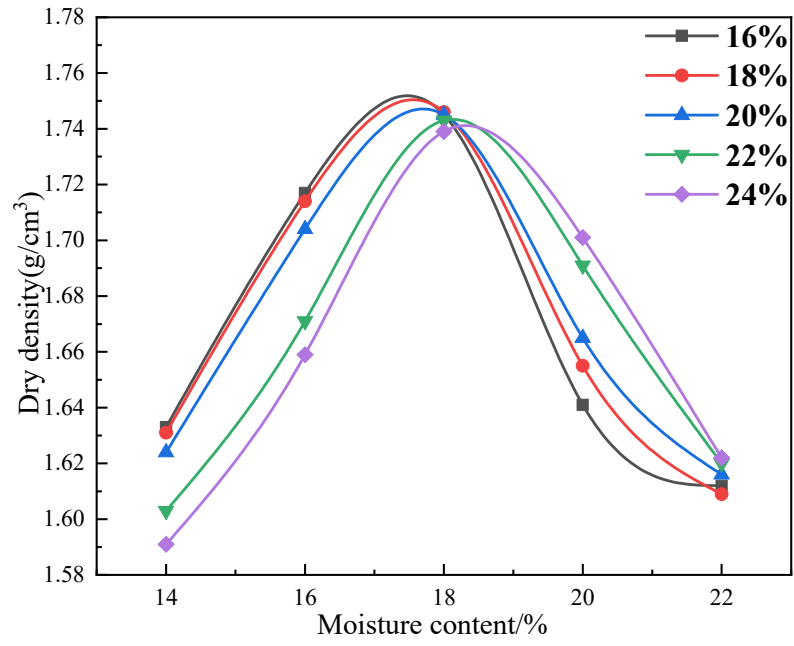

**Figure S2.** Compaction curves of the mixtures of curing agent and saline soil at different curing agent contents.
